# Supplementary material
Source: PubMed Central journal article supplement (PMC4749471)
Supplement: NIHMS732711-supplement-10549_2015_3612_MOESM1_ESM.pdf [file NIHMS732711-supplement-10549_2015_3612_MOESM1_ESM.pdf]

## **SUPPLEMENTARY MATERIAL**

Predictive value and clinical utility of centrally-assessed ER, PgR and Ki-67 to select adjuvant endocrine therapy for premenopausal women with hormone receptor-positive, HER2-negative early breast cancer: TEXT and SOFT trials

Breast Cancer Research and Treatment

**Meredith Regan, et al**

Meredith M. Regan, ScD. IBCSG Statistical Center, Dept. of Biostatistics and Computational Biology, Dana-Farber Cancer Institute, email: [mregan@jimmy.harvard.edu](mailto:mregan@jimmy.harvard.edu)

### **Contents**

|                                                                                                    |   |
|----------------------------------------------------------------------------------------------------|---|
| I. Tables and Figures .....                                                                        | 2 |
| II. TEXT and SOFT Investigators and the International Breast Cancer Study Group Participants ..... | 6 |

## I. Tables and Figures

**Table S1.** Characteristics of the patients with and without invasive tumor material assessed versus by central pathology review (CPR) in the IBCSG Central Pathology Office, of the 5707 patients in the TEXT and SOFT intention-to-treat (ITT) populations.

| Characteristic                                    | CPR Review |      |      |      | All ITT Patients |      |
|---------------------------------------------------|------------|------|------|------|------------------|------|
|                                                   | No         |      | Yes  |      | N                | %    |
|                                                   | N          | %    | N    | %    |                  |      |
| <i>N ITT Patients</i>                             | 889        | 100  | 4818 | 100  | 5707             | 100  |
| Cohort                                            |            |      |      |      |                  |      |
| No chemotherapy SOFT                              | 234        | 26.3 | 1185 | 24.6 | 1419             | 24.9 |
| No chemotherapy TEXT                              | 160        | 18.0 | 893  | 18.5 | 1053             | 18.5 |
| Chemotherapy TEXT                                 | 249        | 28.0 | 1358 | 28.2 | 1607             | 28.2 |
| Prior chemotherapy SOFT                           | 246        | 27.7 | 1382 | 28.7 | 1628             | 28.5 |
| Age at randomization                              |            |      |      |      |                  |      |
| <35                                               | 94         | 10.6 | 488  | 10.1 | 582              | 10.2 |
| 35-39                                             | 164        | 18.4 | 831  | 17.2 | 995              | 17.4 |
| 40-44                                             | 295        | 33.2 | 1535 | 31.9 | 1830             | 32.1 |
| 45-49                                             | 289        | 32.5 | 1514 | 31.4 | 1803             | 31.6 |
| ≥50                                               | 47         | 5.3  | 450  | 9.3  | 497              | 8.7  |
| <u>Locally-determined characteristics</u>         |            |      |      |      |                  |      |
| No. nodes positive                                |            |      |      |      |                  |      |
| N0                                                | 508        | 57.1 | 2864 | 59.4 | 3372             | 59.1 |
| N 1-3                                             | 279        | 31.4 | 1379 | 28.6 | 1658             | 29.1 |
| N 4+                                              | 102        | 11.5 | 575  | 11.9 | 677              | 11.9 |
| Tumor size (path.; cm)                            |            |      |      |      |                  |      |
| Unknown                                           | 40         | 4.5  | 61   | 1.3  | 101              | 1.8  |
| ≤2 cm                                             | 577        | 64.9 | 3018 | 62.6 | 3595             | 63.0 |
| >2 cm                                             | 272        | 30.6 | 1739 | 36.1 | 2011             | 35.2 |
| Tumor grade                                       |            |      |      |      |                  |      |
| Unknown                                           | 32         | 3.6  | 59   | 1.2  | 91               | 1.6  |
| 1                                                 | 173        | 19.5 | 1071 | 22.2 | 1244             | 21.8 |
| 2                                                 | 490        | 55.1 | 2532 | 52.6 | 3022             | 53.0 |
| 3                                                 | 194        | 21.8 | 1156 | 24.0 | 1350             | 23.7 |
| Vessel invasion (lymphatics and/or blood vessels) |            |      |      |      |                  |      |
| Unknown                                           | 74         | 8.3  | 248  | 5.1  | 322              | 5.6  |
| No                                                | 568        | 63.9 | 3141 | 65.2 | 3709             | 65.0 |
| Yes                                               | 247        | 27.8 | 1429 | 29.7 | 1676             | 29.4 |
| HER2 status                                       |            |      |      |      |                  |      |
| Unknown                                           | 28         | 3.1  | 98   | 2.0  | 126              | 2.2  |
| Negative                                          | 751        | 84.5 | 4138 | 85.9 | 4889             | 85.7 |
| Positive                                          | 110        | 12.4 | 582  | 12.1 | 692              | 12.1 |
| Hormone receptor status                           |            |      |      |      |                  |      |
| ER+ / PgR+                                        | 777        | 87.4 | 4260 | 88.4 | 5037             | 88.3 |
| ER+ / PgR-                                        | 75         | 8.4  | 422  | 8.8  | 497              | 8.7  |
| ER+ / PgR unknown                                 | 11         | 1.2  | 50   | 1.0  | 61               | 1.1  |
| ER- / PgR+                                        | 22         | 2.5  | 82   | 1.7  | 104              | 1.8  |
| ER- / PgR-                                        | 2          | 0.2  | 4    | 0.1  | 6                | 0.1  |

| Characteristic                     | CPR Review |      |      |      | All ITT Patients |      |
|------------------------------------|------------|------|------|------|------------------|------|
|                                    | No         |      | Yes  |      | N                | %    |
|                                    | N          | %    | N    | %    |                  |      |
| ER and PgR unknown                 | 2          | 0.2  | -    | -    | 2                | 0.0  |
| Estrogen receptor (ER) status      |            |      |      |      |                  |      |
| Unknown                            | 2          | 0.2  | -    | -    | 2                | 0.0  |
| Negative (<10%)                    | 24         | 2.7  | 86   | 1.8  | 110              | 1.9  |
| Positive (≥10%)                    | 863        | 97.1 | 4732 | 98.2 | 5595             | 98.0 |
| Progesterone receptor (PgR) status |            |      |      |      |                  |      |
| Unknown                            | 13         | 1.5  | 50   | 1.0  | 63               | 1.1  |
| Negative (<10%)                    | 77         | 8.7  | 426  | 8.8  | 503              | 8.8  |
| Positive (≥10%)                    | 799        | 89.9 | 4342 | 90.1 | 5141             | 90.1 |
|                                    |            |      |      |      |                  |      |
| <u>Centrally-determined values</u> |            |      |      |      |                  |      |
| Hormone receptor status            |            |      |      |      |                  |      |
| Not determined                     | -          | -    | 44   | 0.9  | -                | -    |
| Negative (ER and PgR <1%)          | -          | -    | 64   | 1.3  | -                | -    |
| Positive (ER and/or PgR ≥1%)       | -          | -    | 4710 | 97.8 | -                | -    |
| HER2 status                        |            |      |      |      |                  |      |
| Not determined                     | -          | -    | 42   | 0.9  | -                | -    |
| Negative                           | -          | -    | 4388 | 91.1 | -                | -    |
| Positive                           | -          | -    | 388  | 8.1  | -                | -    |

**Figure S1.** Flow diagram of the 4115 patients included in the TEXT and SOFT HR+/HER2- analysis population.

Abbreviations: E=exemestane; HR+=hormone receptor-positive; HER2-=HER2-negative; ITT=intention-to-treat; OFS=ovarian function suppression; SOFT=Suppression of Ovarian Function Trial; T=tamoxifen; TEXT=Tamoxifen and Exemestane Trial;

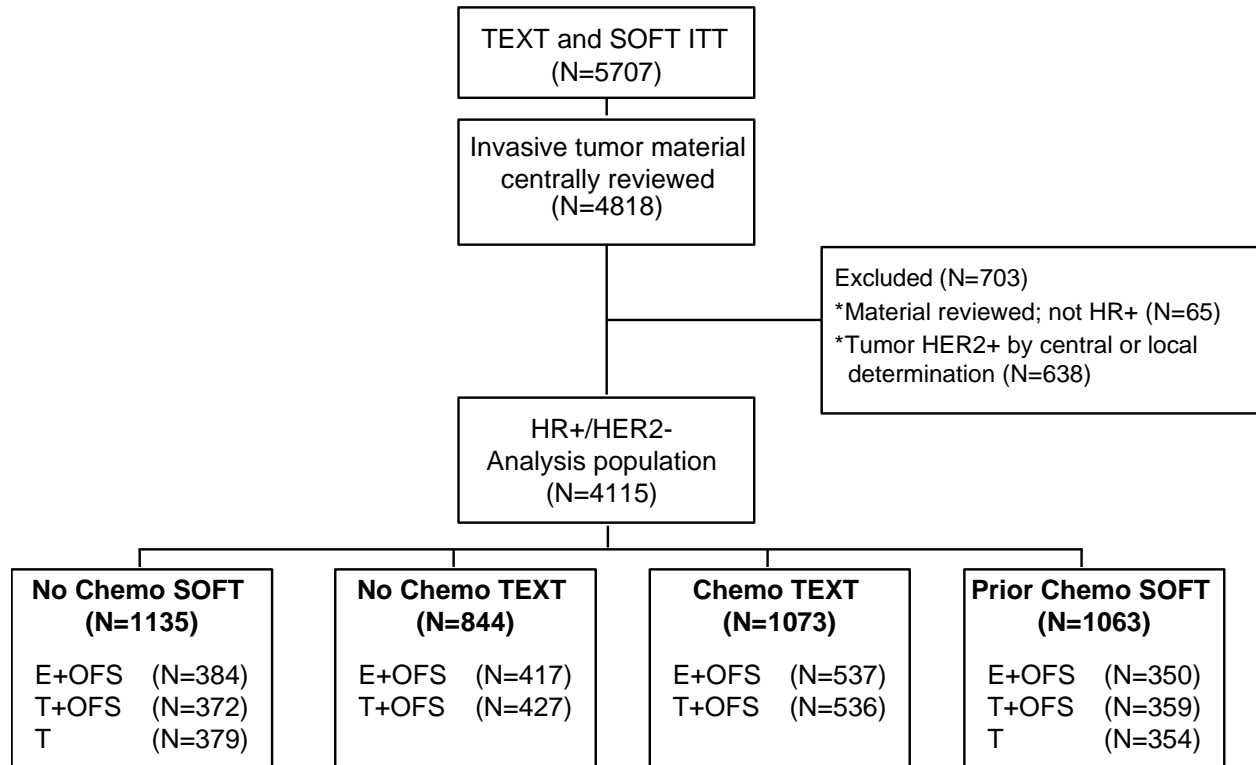

**Figure S2.** Distribution of estrogen receptor (ER), progesterone receptor (PgR) and Ki-67 expression in the HR+/HER2- analysis population overall.

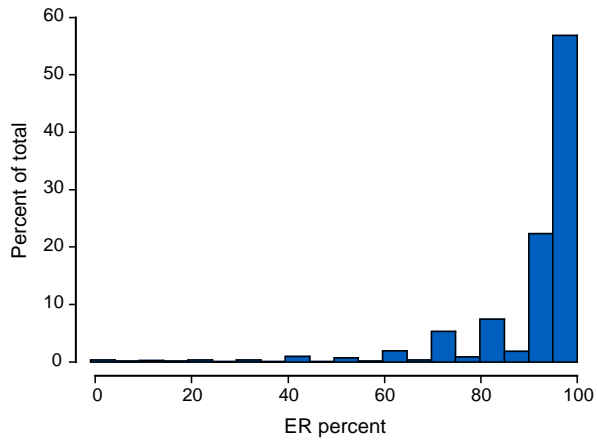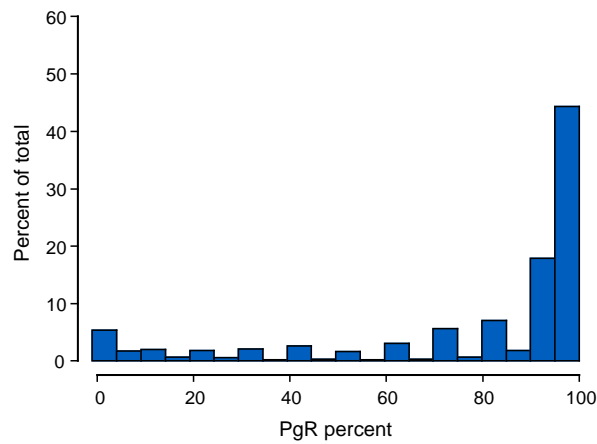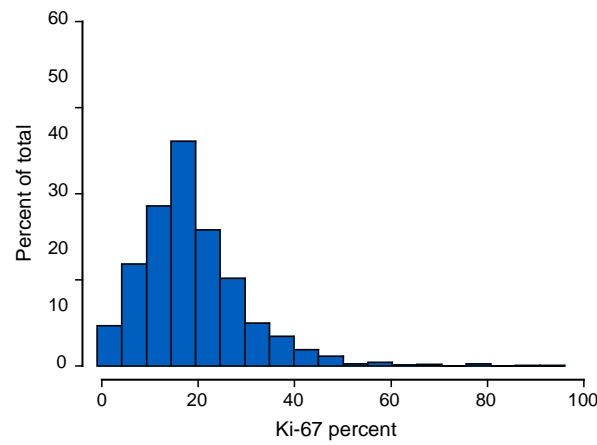

## II. TEXT and SOFT Investigators and the International Breast Cancer Study Group Participants

**Steering Committee:** P.A. Francis (Chair, SOFT Co-Chair), G.F. Fleming (SOFT Co-Chair), O. Pagani (TEXT Co-Chair), B. A. Walley (TEXT Co-Chair), M.M. Regan (Trial Statistician), R. Torrasi, M. Bellet, L. Blacher, H. Bonnefoi, E. Ciruelos, A.S. Coates, M. Colleoni, N. Dif, R.D. Gelber, A. Goldhirsch, T. Heckman-Scolese, A. Hiltbrunner, R. Kammler, R. Maibach, C. Messina, O. Ortmann, E.A. Perez, K.N. Price, M. Rabaglio, B. Ruepp, K. Saini, H. Shaw, G. Viale, G. von Minckwitz, L. Cisar (Pfizer), E. Chetaille (Ipsen)

**IBCSG Scientific Committee:** M. Colleoni (Chair)

**IBCSG Foundation Council:** R. Stahl (President), S. Aebi, A.S. Coates, M. Colleoni, R.D. Gelber, A. Goldhirsch, M. Green, P. Karlsson, I. Kössler, I. Láng

**IBCSG Coordinating Center, Bern, Switzerland:** A. Hiltbrunner (Director), R. Kammler, R. Maibach, M. Rabaglio, S. Roux, B. Ruepp, P. Sicher

**IBCSG Statistical Center, Dana-Farber Cancer Institute, Boston, MA, USA:** R.D. Gelber (Director), M.M. Regan (Group Statistician), J. Aldridge, M. Bonetti, Y. Feng, A. Giobbie-Hurder, K. Gray, H. Huang, W. Luo, K.N. Price, L. Zickl

**IBCSG Data Management Center, Frontier Science & Technology Research Foundation, Amherst, NY, USA:** L. Blacher (Director), K. Scott (DM Section Head), M. Blackwell, A. Cesario, A. Dickinson, K. Donahue, M. Greco, P. Gonzalez, T. Heckman-Scolese, R. Hecker, R. Hinkle, M. Kalera, K. Lupejkis, A. Mora de Karausch, V. Palermo, H. Shaw, J. Swick-Jemison

**IBCSG Central Pathology Office, European Institute of Oncology, Division of Pathology, Milan, Italy:** G. Viale, D. Lepanto, O. Pala

**IBCSG Quality of Life Office, Bern, Switzerland:** J. Bernhard, K. Ribi

**U.S. National Cancer Institute:** J. Abrams, J.A. Zujewski

**U.S. NCI Clinical Trials Support Unit (CTSU)/Westat:** M. Hering, M. Greene, A. Nelson, M. Balois-Ouellette, S. Riordan

**ALMAC:** W. Mahon, E. Whitney, J. Bryant

**CTSU Regulatory Office:** R. Catalano, D. Marinucci, B. Niewood, R. Lambersky

**Alliance (CALGB) Pathology Coordinating Office, Ohio State University, Columbus, OH, USA:** W. Frankel, S. Jewell

**Dana-Farber Cancer Institute, Boston, MA, USA (US FDA IND):** E.P. Winer, J. Savoie

**Pfizer Study Support:** B. Campanelli, J.A. Graham, B. Klingele

**Ipsen Study Support:** E. Chetaille, J. Amauri Soares, C. Descot, S. Hemont-Dacosta, F. Bismuth, P. Chevreau, H. Bibas

### Participating Centers and Principal Investigators

Centers with accrual of more than 1 patient and submission of tumor samples for at least 1 patient

## TEXT

### BREAST INTERNATIONAL GROUP (BIG)

#### INTERNATIONAL BREAST CANCER STUDY GROUP (IBCSG)

**Australia and New Zealand Breast Cancer Trials Group (ANZBCTG), Australia;** Prof. John Forbes, Dianne Lindsay, Lauren Boyes

Austin Health, Heidelberg, Victoria; J. Stewart

Box Hill Hospital, Box Hill, Victoria; J. Chirgwin

Calvary Mater Newcastle, Waratah, New South Wales; A. van der Westhuizen

Coffs Harbour Health Campus, Coffs Harbour, New South Wales; K. Briscoe  
Flinders Medical Centre, Bedford Park, South Australia; B. Koczwara  
Launceston General Hospital, Launceston, Tasmania; S. Gauden  
Liverpool Hospital, Liverpool, New South Wales; E. Moylan  
Macarthur Cancer Therapy Centre, Campbelltown, New South Wales; S. Della-Fiorentina  
Maroondah Hospital, Ringwood East, Victoria; J. Chirgwin  
Peter MacCallum Cancer Centre, East Melbourne, Victoria; P. A. Francis  
Royal Brisbane and Women's Hospital, Herston, Queensland; M. Nottage  
Royal Hobart Hospital, Hobart, Tasmania; D. Boadle  
Royal Perth Hospital, Perth, Western Australia; E. Bayliss  
St. Vincent's Hospital Melbourne, Fitzroy, Victoria; R. Snyder  
Tamworth Rural Referral Hospital, Tamworth, New South Wales; F. Sardelic  
Tweed Hospital, The, Tweed Heads, New South Wales; E. Abdi  
Victorian Breast and Oncology Care, East Melbourne, Victoria; M. Chipman

### **Belgium**

Institute Jules Bordet, Brussels; A. Gombos  
Centre Hospitalier Peltzer-La Tourelle, Verviers; A. Barbeaux  
Centre Hospitalier Regional de la Citadelle, Liège; J. P. Salmon  
Centre Hospitalier Universitaire Sart Tilman, Liège; G. Jerusalem  
U.Z. Gasthuisberg, Leuven; P. Neven  
Centre Hospitalier Regional de Huy, Huy

### **Egypt**

Cairo Oncology Centre, Cairo; H. Azim

### **Hungary**

National Institute of Oncology, Budapest; I. Láng

### **India**

Tata Memorial Hospital, Mumbai; V. Parmar

### **Italy**

Dipartimento di Oncologia, Azienda Ospedaliero-Universitaria di Udine, Udine; F. Plugisi  
Fondazione Salvatore Maugeri, Pavia; L. Pavesi  
Istituto Europeo di Oncologia, Milano; M. Colleoni  
Ospedale degli Infermi, Rimini; L. Gianni  
Ospedale di Circolo e Fondazione Macchi, Varese; G. Pinotti  
Ospedali Riuniti di Bergamo, Bergamo; C. Tondini  
Sandro Pitigliani Medical Oncology Unit, Hospital of Prato, Prato; A. Di Leo  
Spedali Civili, Brescia; E. Simoncini  
Unita Operativa de Medicina Oncologica, Ospedale Ramazzini, Carpi; A. Fabrizio  
Azienda Sanitaria di Bolzano, Bolzano; C. Graiff  
Istituto Clinico Humanitas, Rozzano; A. Santoro

### **Peru**

Instituto de Enfermedades Neoplásicas, Lima; H. Gomez

### **Slovenia**

Institute of Oncology, Ljubljana; E. Skof

### **South Africa**

Sandton Oncology Centre, Johannesburg; D. Vorobiof

### **Sweden**

Sahlgrenska University Hospital, Gothenburg; P. Karlsson  
Linköping University Hospital, Linköping; B. Linderholm

### **Swiss Association for Clinical Cancer Research (SAKK), Switzerland**

Centre Hospitalier Universitaire Vaudois, Lausanne; K. Zamin

Inselspital, Bern; M. Rabaglio  
Oncocare Engeried, Bern; K. Buser  
Institute of Oncology of Southern Switzerland (Ospedale San Giovanni, Bellinzona; Ospedale Regionale di Lugano, (Civico & Italiano), Lugano; Ospedale Regionale Beata Vergine, Mendrisio; Ospedale Regionale La Carità, Locarno; Istituto Cantonale di Patologia, Locarno); O. Pagani  
Kantonsspital St. Gallen, St. Gallen; T. Ruhstaller  
Rätisches Kantonos-/Regionalspital, Chur; R. von Moos  
Kantonsspital Basel, Basel; C. Rochlitz  
Onkologiezentrum Thun-Berner Oberland, Thun; D. Rauch  
Zürich Frauenklinik, Zürich; N. Gabriel

**GERMAN BREAST GROUP (GBG); S. BUCHHOLZ, K. REIBMÜLLER, S. LOIBL G. VON MINCKWITZ**

Caritas-Krankenhaus St. Josef, Regensburg; S. Buchholz  
Mammazentrum, Klinikum Deggendorf, Deggendorf; D. Augustin  
St. Vincentius Kliniken Karlsruhe, Karlsruhe; O. Tomé  
Dr. Horst Schmidt Kliniken, Wiesbaden; F. Lorenz-Salehi  
Klinikum Mittelbaden, Baden-Baden; A. Hahn  
Universitäts-Frauenklinik Lübeck, Lübeck; D. Lüdders

**ICR-CTSU ON BEHALF OF THE NATIONAL CANCER RESEARCH INSTITUTE (NCRI) BREAST CLINICAL STUDIES GROUP, UNITED KINGDOM; H. EARL, J. BLISS, A. GILLMAN, N. ATKINS**

Addenbrookes Hospital, Cambridge; H. Earl  
Peterborough District Hospital, Peterborough; K. McAdam

**NORTH AMERICAN BREAST CANCER GROUP**

American College of Surgeons Oncology Group (ACOSOG, now part of Alliance for Clinical Trials in Oncology)  
Cancer and Leukemia Group B (CALGB, now part of Alliance for Clinical Trials in Oncology)  
Eastern Cooperative Oncology Group (ECOG, now part of ECOG-ACRIN Cancer Research Group); N. Davidson, V. Stearns, R.M. O'Regan, S. Gluck  
NCIC Clinical Trials Group (NCIC CTG); K.I. Pritchard, T. Whelan, K. Gelmon, M. Webster  
National Surgical Adjuvant Breast and Bowel Project (NSABP, now part of NRG Oncology)  
North Central Cancer Treatment Group (NCCTG, now part of Alliance for Clinical Trials in Oncology); M.P. Goetz  
Radiation Therapy Oncology Group (RTOG, now part of NRG Oncology)  
SWOG; G.N. Hortobagyi, S. Martino, J.R. Gralow, A.F. Scott

**NORTH AMERICAN PARTICIPATING CENTERS**

**Canada**

Cross Cancer Institute, Edmonton, Alberta; K.S. Tonkin  
Tom Baker Cancer Center, Calgary, Alberta; B.A. Walley (Chair), M. Webster (PI)  
London Regional Cancer Center, London, Ontario; K.R. Potvin  
Juravinski Cancer Centre at Hamilton Health Sciences, Hamilton, Ontario; R.G. Tozer  
Trillium Health Centre - W Toronto, Toronto, Ontario; J.A. Gapski  
Hôpital Charles LeMoyné, Greenfield Park, Quebec; C. Prady  
Allan Blair Cancer Center, Regina, Saskatchewan; M. Salim  
Saskatoon Cancer Center, Saskatoon, Saskatchewan; A. Sami  
The Vitalite Health Network - Dr. Leon Richard Oncology Centre, Moncton, New Brunswick; P. Whitlock



Hopital du Sacre-Coeur de Montreal, Quebec; J. A. Roy  
Windsor Regional Cancer Centre, Ontario; C. Hamm

### **United States of America**

Presbyterian Hospital, Whittier, CA; J.H. Freimann  
University of California at San Diego, San Diego, CA; J.E. Mortimer  
San Francisco General, San Francisco, CA; H.S. Rugo  
University of California at San Francisco, San Francisco, CA; C.J. Ryan  
University of California San Diego Cancer Center, San Diego, CA; B.A. Parker  
University of Colorado, Aurora, CO; A.D. Elias  
University of Connecticut, Farmington, CT; S. Tannenbaum  
Walter Reed Army Medical Center, Washington, DC; D.C. Van Echo  
Mayo Clinic Jacksonville, Jacksonville, FL; E. Perez  
Siouxland Hematology - Oncology Associates, Sioux City, IA; D.B. Wender  
Saint Luke's Mountain States Tumor Institute, Boise, ID; T.A. Walters  
Evanston Northwestern Healthcare, Evanston, IL; D.E. Merkel  
John H. Stroger, Jr., Hospital of Cook County, Chicago, IL; H.A. Zaren  
Resurrection Medical Center, Chicago, IL; C. G. Rose  
University of Chicago, Chicago, IL; H.L. Kindler  
Saint Joseph's Medical Center, South Bend, IN; R.H. Ansari  
Memorial Hospital of South Bend, South Bend, IN; R.H. Ansari  
Fort Wayne Medical Oncology/Hematology Incorporated, Fort Wayne, IN; S.R. Nattam  
Northern Indiana Cancer Research Co, South Bend, IN; R.H. Ansari  
Mount Carmel Regional Cancer Center, Pittsburg, KS  
Stormont-Vail Regional Health Center, Topeka, KS; S.J. Vogel  
Addison Gilbert, Gloucester, MA; A.P. McIntyre  
Tufts Medical Center, Boston, MA; J.K. Erban  
Massachusetts General Hospital, Boston, MA; H.J. Burstein  
Dana-Farber Cancer Institute, Boston, MA; H.J. Burstein  
Beth Israel Deaconess Medical Center, Boston, MA; H.J. Burstein  
Faulkner Hospital, Boston, MA; H.J. Burstein  
North Shore Cancer Center, Salem, MA; K.J. Krag  
Emerson Hospital, Boston, MA; H.J. Burstein  
Suburban Hospital, Bethesda, MD; C.B. Hendricks  
University of Maryland Greenebaum Cancer Center, Baltimore, MD; K.H. Rak Tkaczuk  
Mercy Medical Center, Baltimore, MD; D.A. Riseberg  
William Beaumont Hospital, Royal Oak, MI; D. Zakalik  
United Hospital, St. Paul, MN; P.J. Flynn  
Abbott-Northwestern Hospital, St. Louis Park, MN; P.J. Flynn  
Mercy Hospital, Coon Rapids, MN; P.J. Flynn  
Mayo Clinic, Rochester, MN; J.N. Ingle  
Saint John's Hospital - Healtheast, Minneapolis, MN; D.J. Schneider  
Metro-Minnesota CCOP, Minneapolis, MN; P.J. Flynn  
Washington School of Medicine, St Louis, MO; M.J. Naughton  
Kansas City CCOP, Kansas City, MO; W.T. Stephenson  
Montana Cancer Consortium CCOP, Billings, MT; B.T. Marchello  
Moses H. Cone Memorial, Greensboro, NC; J.E. Feldmann  
Mission Hospitals Inc, Asheville, NC; M.J. Messino  
Hope, A Women's Cancer Center, Asheville, NC; D.J. Hetzel  
Medcenter One Health Systems, Bismarck, ND; E.J. Wos

Dakota Clinic, Fargo, ND; K. Sen  
University of Nebraska Medical Center, Omaha, NE; E.C. Reed  
Portsmouth Regional Hospital, Portsmouth, NH; E.M. Bonnem  
South Jersey Healthcare, Vineland, NJ; D.H. Blom  
Virtua West Jersey Hospitals, Marlton, NJ; M.S. Entmacher  
New York University Medical Center, New York, NY; A.D. Tiersten  
Albert Einstein College/Medicine, Bronx, NY; C.M. Pellegrino  
Roswell Park Cancer Institute, Buffalo, NY; E.G. Levine  
Aultman Hospital, Canton, OH; J.A. Schmotzer  
Geisinger Medical Center, Danville, PA; G.D.A. Padula  
Sioux Valley Clinic - Oncology, Sioux Falls, SD; M.A. Mazurczak  
University of Vermont, Burlington, VT; S. Burdette-Radoux  
Mountainview Medical, Berlin, VT; S. Burdette-Radoux  
Swedish Hospital Medical Center, Seattle, WA; S.E. Rivkin  
University of Washington Medical Center, Seattle, WA; S.E. Rivkin  
Aspirus Wausau Hospital Center, Wausau, WI; U. Gautam  
Oncology Alliance-Glendale, Glendale, WI; R.D. Hart  
West Virginia University, Morgantown, WV; J. Abraham

## **SOFT**

### **BREAST INTERNATIONAL GROUP (BIG)**

#### **INTERNATIONAL BREAST CANCER STUDY GROUP (IBCSG)**

**Australia and New Zealand Breast Cancer Trials Group (ANZBCTG), Australia;** Prof. John Forbes,  
Dianne Lindsay, Lauren Boyes  
Austin Health, Heidelberg, Victoria; J. Stewart  
Ballarat Oncology and Haematology Services, Wendouree, Victoria; G. Kannourakis  
Border Medical Oncology, Wodonga, Victoria; C. Underhill  
Calvary Mater Newcastle, Waratah, New South Wales; A. van der Westhuizen  
Canberra Hospital, The Garran, Australian Capital Territory; A. Davis  
Coffs Harbour Health Campus, Coffs Harbour, New South Wales; K. Briscoe  
Concord Repatriation General Hospital, Concord, New South Wales; P. Beale  
Launceston General Hospital, Launceston, Tasmania; S. Gauden  
Liverpool Hospital, Liverpool, New South Wales; E. Moylan  
Macarthur Cancer Therapy Centre, Campbelltown, New South Wales; S. Della-Fiorentina  
Manning Rural Referral Hospital, Taree, New South Wales; E. Livshin  
Maroondah Hospital, Ringwood East, Victoria; J. Chirgwin  
The Mater Hospital, North Sydney, New South Wales; F. Boyle  
Monash Medical Centre, East Bentleigh, Victoria; M. White  
Mount Hospital, Perth, Western Australia; A. Chan  
Nambour Hospital, Nambour, Queensland; G. Hawson  
Peter MacCallum Cancer Center, East Melbourne, Victoria; P.A. Francis  
Riverina Cancer Care Centre, Wagga Wagga, New South Wales; J. Hill  
Royal Adelaide Hospital, Adelaide, South Australia; P. G. Gill  
Royal Brisbane and Women's Hospital, Herston, Queensland; M. Nottage  
Royal Hobart Hospital, Hobart, Tasmania; D. Boadle  
Royal North Shore Hospital, St. Leonards, New South Wales; S. Baron-Hay  
Royal Prince Alfred Hospital, Camperdown, New South Wales; J. Beith  
St. Andrews Toowoomba Hospital, Toowoomba, Queensland; P. Vasey

St. George Hospital, Kogarah, New South Wales; J. Lynch  
St. John of God Hospital, Bunbury, Western Australia; M. Buck  
St. John of God Hospital, Subiaco, Western Australia; S. Ng  
St. Vincents Hospital, Fitzroy, Victoria; R. Snyder  
St. Vincent's Hospital, Darlinghurst, New South Wales; R. Epstein  
Tweed Hospital, The, Tweed Heads, New South Wales; E. Abdi  
Victorian Breast and Oncology Care, Melbourne, Victoria; M. Chipman  
**Australia and New Zealand Breast Cancer Trials Group (ANZBCTG), New Zealand**

Auckland City Hospital, Auckland; V.J. Harvey  
Christchurch Hospital, Christchurch; B. Fitzharris  
Waikato Hospital, Hamilton; I. Campbell

#### **Brazil**

Hospital de Clinicas de Porto Alegre, Porto Alegre; J. Villanova Biazús

#### **Grupo Oncológico Corporativo Chileno de Investigación (GOCCHI), Chile; A. Corvalan, B. Muller**

Instituto Nacional del Cancer, Santiago; R. Torres  
Hospital San Juan de Dios, Santiago; S. Torres  
Hospital San Borja Arriaran, Santiago; J. Letzkus  
Hospital Clinico de la Universidad de Chile, Santiago; O. Barajas  
Hospital Dr.Sotero Del Rio, Santiago; H. Rojas  
Centro De Patologia Mamaria, Santiago; M.E. Bravo  
Hospital Base de Valdivia, Valdivia; B. Cardemil  
Instituto De Radiomedicina, Vitacura; R. Baeza

#### **Hungary**

National Institute of Oncology, Budapest; I. Láng

#### **India**

Tata Memorial Hospital, Mumbai; V. Parmar

#### **Italy**

Azienda Sanitaria di Bolzano, Bolzano; C. Graiff  
Ospedali Riuniti di Bergamo, Bergamo; C. Tondini  
Ospedale degli Infermi, Biella; M. Clerico  
Unita Operativa de Medicina Oncologica, Ospedale Ramazzini, Carpi; A. Fabrizio  
Oncologia Medica Fano Italy, Fano; R. Mattioli  
Ospedale Civile di Lecco, Lecco; M. Visini  
Fondazione Salvatore Maugeri, Pavia; L. Pavesi  
Ospedale degli Infermi, Rimini; L. Gianni  
Ospedale di Circolo e Fondazione Macchi, Varese; G. Pinotti  
Dipartimento di Oncologia, Azienda Ospedaliero-Universitaria di Udine, Udine; F. Puglisi

#### **Peru**

Instituto de Enfermedades Neoplásicas, Lima; H.L. Gomez

#### **South Africa**

Sandton Oncology Centre, Johannesburg; D. Vorobiof

#### **Sweden**

Sahlgrenska University Hospital, Gothenburg; P. Karlsson  
Central Hospital Karlstad, Karlstad; B. Loden  
Karolinska University Hospital, Stockholm; J. Bergh  
Lund University Hospital, Lund; P. Malmström  
Skaraborg Hospital Skovde, Skovde; A. Nissborg  
Southern Elfsborg Hospital Boras, Boras; P. Karlsson

#### **Swiss Association for Clinical Cancer Research (SAKK), Switzerland**

Centre Hospitalier Universitaire Vaudois, Lausanne; K. Zaman

Inselspital, Berne; M. Rabaglio  
Kantonsspital St. Gallen, St. Gallen; T. Ruhstaller  
Rätisches Kantonos-/Regionalspital, Chur; R. von Moos  
Kantonsspital Basel, Basel; C. Rochlitz  
Onkologiezentrum Thun-Berner Oberland, Thun; D. Rauch  
Oncocare Engeried, Bern; K. Buser  
Zürich Frauenklinik, Zürich; N. Gabriel  
Brust-Zentrum Zurich, Zurich; C. Rageth  
Kantonsspital Aarau (AG), Aarau; A. Schoenenberger  
Tumor Zentrum Hirslanden Klinik, Aarau; R. Popescu  
Kantonsspital Baden, Baden; C. Caspar  
Tumor und Brustzentrum Zetup St. Gallen, St. Gallen; H.J. Senn

### **SOLTI, SPAIN; E. CIRUELOS**

Hospital Clinic i Provincial de Barcelona , Barcelona; M. Muñoz  
Hospital Universitari Vall D' Hebron, Barcelona; M. Bellet  
Hospital Universitario 12 de Octubre, Madrid; E. Ciruelos  
Centro Oncologico MD Anderson, Madrid; A. González Martín  
Hospital Son Llatzer, Palma de Mallorca; J. G. Catalán  
Clinica Univ. De Navarra, Pamplona; J. M. Aramendia  
Instituto Valenciano de Oncologia, Valencia; M.A. Climent  
Hospital Son Dureta (Palma de Mallorca), Palma de Mallorca; J. Rifà  
Hospital Santiago De Compostela, Santiago de Compostela; R. López  
H.U. Arnau de Vilanova, Lleida; A. Llombart  
Hospital Universitario Virgen Macarena, Sevilla; J.A. Virizuela  
Hospital Clinico Universitario de Valencia, Valencia; A. Lluch  
Hospital Ramon Y Cajal, Madrid; N. Martinez Jañez  
Hospital Sant Joan de Reus, Reus; M. Melé  
Hospital Reina Sofia De Cordoba, Cordoba; J.R. de la Haba  
Hospital Dr Negrin, Las Palmas de Gran Canari; Negrin; U. Bohn  
Hospital Sant Pau i Santa Tecla, Tecla; C. Pérez Segura

### **CENTRAL AND EAST EUROPEAN ONCOLOGY GROUP (CEEEOG); J. JASSEM**

#### **Poland**

Medical University of Gdansk, Gdansk, Poland; J. Jassem

#### **Serbia**

Institute of Oncology & Radiology of Serbia, Belgrade, Serbia; Z. Neskovic-Konstantinovic

### **EUROPEAN ORGANISATION FOR RESEARCH AND TREATMENT OF CANCER (EORTC); N. DIF, J. BOGAERTS, K. TRYFONIDIS**

#### **Belgium**

ZNA Middelheim, Antwerpen; A. Vandebroek  
Cliniques Universitaires St-Luc UCL, Brussels; M. Berliere  
U.Z. Gasthuisberg, Leuven; P. Neven  
Centre Hospitalier Universitarie Sart Tilman, Liège; G. Jerusalem  
Hopital De Jolimont, Haine St. Paul; C. Mitine  
Clinique Sainte Elisabeth, Namur; P. Vuylsteke  
Algemeen Ziekenhuis Sint-Augustinus, Wilrijk; L. Dirix

#### **France**

Centre Henri Becquerel, Rouen; C. Moldovan  
Institut Claudius Regaud, Toulouse; B. de Lafontan  
Institut Jean Godinot, Reims; C. Jouannaud  
Centre Leon Berard, Lyon; T. Bachelot  
Institut Bergonie, Bordeaux; H. Bonnefoi  
Centre Georges Francois-Leclerc, Dijon; I. Desmoulins  
Centre Rene Huguenin, Saint-Cloud; E. Brain  
Institut Curie, Paris; J.Y. Pierga  
Centre Eugene Marquis, Rennes; P. Kerbrat  
C.H.R.U. de Limoges, Limoges; N. Tubiana-Mathieu  
Clinique Mutualiste de l'Estuaire, Saint-Nazaire; V. Delecroix

**Israel**

Rambam Medical Center, Haifa; G. Fried

**Netherlands**

Onze Lieve Vrouwe Gasthuis, Amsterdam; O. Leeksma  
Leids Universitair Medisch Centrum, Leiden; J. Kroep

**Portugal**

Centro de Lisboa, Lisboa; A. Moreira

**Turkey**

Marmara University Hospital, Istanbul; F. Dane

**GERMAN BREAST GROUP (GBG); S. BUCHHOLZ, K. REIBMÜLLER, S. LOIBL G. VON  
MINCKWITZ**

DRK Kliniken Berlin Köpenick, Berlin; A. Kleine-Tebbe  
Praxis Dr. Tessen, Goslar; H.W. Tessen  
Martin-Luther-Universität Halle-Wittenberg, Halle an der Saale; C. Thomssen  
Universitätsfrauenklinik Erlangen, Erlangen; M.W. Beckmann  
Klinikum Mittelbaden/Stadtklinik Baden-Baden, Baden-Baden; A. Hahn  
Dr. Horst Schmidt Kliniken, Wiesbaden; F. Lorenz-Salehi  
St. Vincentius Kliniken, Karlsruhe; O. Tomé  
Klinikum Landshut GmbH, Landshut; I. Bauerfeind  
Universitäts Frauenklinik, Frankfurt/Main; B. Schnappauf  
Caritas-Krankenhaus St. Josef, Regensburg; S. Buchholz  
Krankenhaus der Barmherzigen Brüder, Regensburg; H. Stauder

**ALL IRELAND COOPERATIVE ONCOLOGY RESEARCH GROUP (ICORG)**

Beaumont Hospital, Dublin; L. Grogan  
Mater Misericordiae Hospital, Dublin; J. McCaffrey  
Mater Private Hospital, Dublin; J. McCaffrey  
Univiversity College Hospital Galway, Galway; M. Keane  
South Infirmary-Victoria University Hospital, Cork; S. O'Reilly  
Adelaide, Meath & National Children's Hospital, Dublin; J. Walshe

**ICR-CTSU ON BEHALF OF THE NATIONAL CANCER RESEARCH INSTITUTE (NCRI) BREAST  
CLINICAL STUDIES GROUP, UNITED KINGDOM; R. COLEMAN, J. BLISS, A. GILLMAN, N. ATKINS**

South Tyneside District Hospital, South Shields, Tyne & Wear; G. Mazdai  
Weston Park Hospital, Sheffield, South Yorkshire; R. Coleman  
Mount Vernon Hospital, Northwood, Middlesex; A. Makris  
Luton & Dunstable Hospital, Luton; A. Makris

Clatterbridge Centre for Oncology, Wirral; S. O'Reilly  
Great Western Hospital, Swindon; D. Cole  
New Cross Hospital, Wolverhampton; M Churn  
Whiston Hospital, Prescot; H. Ines  
Aberdeen Royal Infirmary, Aberdeen; R. Todd  
Royal Marsden Hospital - Fulham, London; I.E. Smith  
Royal Marsden Hospital - Sutton, Surrey; I.E. Smith  
York Hospital, York; J. Joji  
St. James Univ Hospital, Leeds; T. Perren  
Harrogate District Hospital, Harrogate; J. Joji  
Stepping Hill Hospital, Stockport; A. Chittalia  
Russells Hall Hospital, Dudley; P. Ramachanara

## **NORTH AMERICAN BREAST CANCER GROUP**

American College of Surgeons Oncology Group (ACOSOG, now part of Alliance for Clinical Trials in Oncology)  
Cancer and Leukemia Group B (CALGB, now part of Alliance for Clinical Trials in Oncology)  
Eastern Cooperative Oncology Group (ECOG, now part of ECOG-ACRIN Cancer Research Group); N. Davidson, V. Stearns, R.M. O'Regan, S. Gluck  
NCIC Clinical Trials Group (NCIC CTG); K.I. Pritchard, T. Whelan, K. Gelmon, M. Webster  
National Surgical Adjuvant Breast and Bowel Project (NSABP, now part of NRG Oncology)  
North Central Cancer Treatment Group (NCCTG, now part of Alliance for Clinical Trials in Oncology); J.N. Ingle  
Radiation Therapy Oncology Group (RTOG, now part of NRG Oncology)  
SWOG; G.N. Hortobagyi, S. Martino, J.R. Galow, A.F. Scott

## **NORTH AMERICAN PARTICIPATING CENTERS**

### **Canada**

Doctor H. Bliss Murphy Cancer Center, St. John's, Newfoundland; J.S. McCarthy  
BCCA-Vancouver Cancer Center, Vancouver, British Columbia; H. Kennecke  
CHUM- Hotel Dieu du Montreal, Montreal, Quebec; A. Robidoux  
Hopital Du Sacre-Coeur de Montreal, Montreal, Quebec; J.A. Roy  
Hôpital Charles LeMoyné, Greenfield Park, Quebec; C. Prady  
Cancer Centre of Southeastern Ontario at Kingston General Hospital, Kingston, Ontario; V. Kumar  
Ottawa Hospital Research Institute, Ottawa, Ontario; S.F. Dent  
Thunder Bay Regional Health Science Centre, Thunder Bay, Ontario; D. Vergidis  
Health Sciences North, , Sudbury, Ontario; P.G. Lopez  
Juravinski Cancer Centre at Hamilton Health Sciences, Hamilton, Ontario; R. G. Tozer  
Odette Cancer Centre, Toronto, Ontario; K.I. Pritchard  
London Regional Cancer Center, London, Ontario; K.R. Potvin  
Cancercare Manitoba, Winnipeg, Manitoba; D. Grenier  
Cross Cancer Institute, Edmonton, Alberta; K.S. Tonkin  
Tom Baker Cancer Center, Calgary, Alberta; B.A. Walley (Chair), M. Webster (PI)  
BCCA Cancer Center for the Southern Interior, Kelowna, British Columbia; S. Ellard  
BCCA-Fraser Valley Cancer Center, Surrey, British Columbia; G. K. Pansegrau  
Allan Blair Cancer Centre, Regina, Saskatchewan; M. Salim

### **United States of America**

Providence Alaska Medical Center, Anchorage, AK; J.E. Anderson

University of Alabama, Birmingham, AL; R. Diasio  
University of California at Los Angeles (UCLA), Los Angeles, CA; P.A. Ganz  
University of Southern California, Los Angeles, CA; C.A. Russel  
Scripps Clinic - La Jolla, La Jolla, CA; J.F. Kroener  
University of California San Diego Moores Cancer Center, San Diego, CA; B.A. Parker  
John Muir Medical Center, Concord, CA; J.T. Ganey  
Kaiser Permanente - Fremont, Fremont, CA; L. Fehrenbacher  
Alta Bates Hospital, Berkeley, CA; D.H. Irwin  
Kaiser Permanente Santa Teresa (San Jose), Vallejo, CA; L. Fehrenbacher  
Mercy General Hospital, Carmichael, CA; M. Javeed  
Kaiser Permanente-San Francisco, Vallejo, CA; L. Fehrenbacher  
Santa Rosa Memorial Hospital, Santa Rosa, CA; I.C. Anderson  
Stanford University Medical Center, Stanford, CA; I.L. Wapnir  
Kaiser Permanente, San Diego, CA; J.A. Polikoff  
Glendale Memorial Hospital and Health Center, Glendale, CA; G. Al-Jazayrly  
Penrose-Saint Francis Healthcare, Colorado Springs, CO; E.R. Pajon  
Front Range Cancer Specialists, Fort Collins, CO; D. Medgyesy  
Longmont United Hospital, Longmont, CO; E.R. Pajon  
The Shaw Regional Cancer Center, Aurora, CO; A.D. Elias  
Greenwich Hospital, Greenwich, CT; B.J. Drucker  
Norwalk Hospital, Norwalk, CT; R.C. Frank  
Stamford Hospital, Stamford, CT; I. Tepler  
Eastern Connecticut Hematology and Oncology Associates, Norwich, CT; K. Jagathambal  
Northwest Connecticut Oncology - Hematology Associates, Torrington, CT; D.S. Brandt  
Georgetown University Hospital, Washington, DC; C. Isaacs  
Washington Hospital Center, Washington, DC; A. Aggarwal  
Sibley Memorial Hospital, Washington, DC; F. Barr  
Christiana Healthcare Services - Christian Hospital, Newark, DE; D.D. Biggs  
Memorial Cancer Institute, Hollywood, FL  
Mount Sinai Medical Center CCOP, Miami Beach, FL; M.A. Schwartz  
Holy Cross Hospital, Fort Lauderdale, FL; R.C. Lilenbaum  
Sarasota Memorial Hospital, Sarasota, FL  
DeKalb Medical Center, Atlanta, GA; T.E. Seay  
Emory University, Atlanta, GA; R.M. O'Regan  
Memorial Health University Medical Center, Savannah, GA; H.C. Lebos  
Atlanta Regional CCOP, Atlanta, GA; T.E. Seay  
Augusta Oncology Associates, Inc., Augusta, GA; M.R. Keaton  
St. Joseph's/Candler Health System, Savannah, GA; M.A. Taylor  
Mercy Medical Center - North Iowa, Mason City, IA; W.W. Bate  
Medical Associates Clinic, Professional Corporation, Dubuque, IA; C. Holm  
Loyola University Medical Center, Maywood, IL; K.S. Albain  
University of Chicago, Chicago, IL; H.L. Kindler  
St. Anthony Medical Center, Rockford, IL; R.E. Nora  
Decatur Memorial Hospital, Decatur, IL; J.L. Wade  
Memorial Medical Center, Springfield, IL; J.L. Wade  
Ingalls Memorial Hospital, Harvey, IL; M.F. Kozloff  
Community Regional Cancer Care North, Indianapolis, IN; R. Walling  
Indiana University Medical Center, Indianapolis, IN; K.D. Miller  
Fort Wayne Medical Oncology/Hematology Incorporated, Fort Wayne, IN; S.R. Nattam  
Northern Indiana Consortium, South Bend, IN; R.H. Ansari

Cancer Center of Kansas - Wichita, Wichita, KS; S.R. Dakhil  
Via Christi Regional Medical Center, Wichita, KS; S.R. Dakhil  
Louisiana State University, Shreveport, LA; G.M. Mills  
Tufts Medical Center, Boston, MA; J.K. Erban  
Massachusetts General Hospital, Boston, MA; H.J. Burstein  
Dana-Farber Cancer Institute, Boston, MA; H.J. Burstein  
Beth Israel Deaconess Medical Center, Boston, MA; H.J. Burstein  
North Shore Cancer Center, Salem, MA; K.J. Krag  
Suburban Hospital, Bethesda, MD; C.B. Hendricks  
Johns Hopkins University, Baltimore, MD; A.C. Wolff  
Anne Arundel Medical Center, Annapolis, MD; S.P. Watkins  
Kaiser Permanente - Shady Grove Medical Center, Rockville, MD; L.C. Hwang  
Eastern Maine Medical Center, Bangor, ME; H.M. Segal  
Mercy Hospital, Portland, ME; R.C. Inhorn  
William Beaumont Hospital, Royal Oak, MI; D. Zakalik  
University of Michigan Medical Center, Ann Arbor, MI; A.F. Schott  
Wayne State University, Detroit, MI; R.T. Morris  
Mid-Michigan Medical Center, Midland, MI; M.R. Hurtubise  
Regions Hospital, Minneapolis, MN; D.J. Schneider  
United Hospital, St. Paul, MN; P.J. Flynn  
Duluth Clinic, Duluth, MN; R.J. Dalton  
Mayo Clinic, Rochester, MN; J.N. Ingle  
Saint Francis Regional Medical Center, Shakopee, MN; D.J. Schneider  
Washington University School of Medicine, St Louis, MO; M.J. Naughton  
Saint John's Regional Health Center, Springfield, MO; J.W. Goodwin  
Missouri Baptist Medical Center, Saint Louis, MO; A.P. Lyss  
Montana Cancer Consortium CCOP, Billings, MT; B.T. Marchello  
University of North Carolina, Chapel Hill, NC; T.C. Shea  
Mission Hospitals Inc, Asheville, NC; M.J. Messino  
Forsyth Memorial Hospital, Winston-Salem, NC; J.O. Hopkins  
Northeast Medical Center, Concord, NC; J.G. Wall  
Hope, A Women's Cancer Center, Asheville, NC; D.J. Hertzell  
Altru Hospital, Grand Forks, ND; T. Dentchev  
Elliot Hospital, Manchester, NH; D. Weckstein  
Dartmouth Hitchcock Medical Center, Lebanon, NH; P.A. Kaufman  
Saint Barnabas Medical Center, Livingston, NJ; R.A. Michaelson  
Cooper Hospital University Medical Center, Newark, NJ; D.D. Biggs  
Cancer Institute of New Jersey, New Brunswick, NJ; D.L. Toppmeyer  
Cancer Institute of New Jersey At Hamilton, Trenton, NJ; D.L. Toppmeyer  
University of Nevada At Reno Washoe Medical Center, Reno, NV  
Saint Vincent's Hospital and Medical Center of New York, New York, NY; P. Klein  
Memorial Sloan Kettering Cancer Center, New York, NY; C.A. Hudis  
Weill Medical College of Cornell University, New York, NY; J. Leonard  
Staten Island University Hospital, Staten Island, NY; M. Odaimi  
Albert Einstein College/Medicine, Bronx, NY; C.M. Pellegrino  
Montefiore Medical Center, Bronx, NY; C.M. Pellegrino  
North Shore University Hospital, Manhasset, NY; D.R. Budman  
Brookdale Hospital Medical Center, Brooklyn, NY; M.R. Kalavar  
Roswell Park Cancer Institute, Buffalo, NY; E.G. Levine  
Ohio State University Hospital, Columbus, OH; C.D. Bloomfield



Cleveland Clinic Foundation, Cleveland, OH; G.T. Budd  
Case Western Reserve University, Cleveland, OH; P. Silverman  
Fairview Hospital, Cleveland, OH; G.T. Budd  
Aultman Hospital, Canton, OH; J.A. Schmotzer  
Samaritan North Health Center, Dayton, OH; H.M. Gross  
Lima Memorial Hospital, Toledo, OH; P.L. Schaefer  
Cleveland Clinic Wooster Specialty Center, Wooster, OH; G.T. Budd  
Kaiser Permanente, Portland, OR; N.R. Tirumali  
Allegheny Cancer Center Network, Pittsburgh, PA; N. Wolmark  
University of Pittsburgh, Pittsburgh, PA; A.M. Brufsky  
Lancaster General Hospital, Lancaster, PA; R.J. Gottlieb  
Abramson Cancer Center of the University of Pennsylvania, Philadelphia, PA; S.M. Domchek  
Fox Chase Cancer Center, Philadelphia, PA; L.J. Goldstein  
Chester County Hospital, West Chester, PA; W.E. Luginbuhl  
St. Mary Regional Cancer Center, Langhorne, PA; R.E. Reilly  
Abington Memorial Hospital, Abington, PA; W.G. Andrews  
Scranton Hematology Oncology, Scranton, PA; M. Hyzinski  
Rhode Island Hospital, Providence, RI; W.M. Sikov  
Women's and Infants Hospital, Providence, RI; D.S. Dizon  
Sioux Valley Clinic - Oncology, Sioux Falls, SD; M.A. Mazurczak  
Erlanger Medical Center, Chattanooga, TN; L.L. Schlabach  
Jones Clinic, Germantown, TN; B.A. Mullins  
Presbyterian Hospital of Dallas, Dallas, TX; J.F. Strauss  
M.D. Anderson Cancer Center, Houston, TX; M.C. Green  
Baylor College of Medicine, Houston, TX; R.M. Elledge  
Doctor's Hospital of Laredo, Laredo, TX; G.W. Unzeitig  
University of Vermont, Burlington, VT; S. Burdette-Radoux  
Swedish Hospital Medical Center, Seattle, WA; S.E. Rivkin  
Southwest Washington Medical Center, Vancouver, WA; K.S. Lanier  
University of Wisconsin, Madison, WI; J.A. Stewart  
Saint Vincent Hospital, Green Bay, WI; T.J. Saphner  
Midelfort Clinic, Eau Claire, WI; G.S. Nambudiri  
Green Bay Oncology LTD at Saint Mary's Hospital, Green Bay, WI; T.J. Saphner  
Marshall University Medical Center, Huntington, WV; M.R.B. Tria Tirona
